# Supplementary material for: Artificial intelligence guided screening for cardiomyopathies in an obstetric population: a pragmatic randomized clinical trial
Source: PubMed Central journal article supplement — Nat Med. 2024 Sep 2;30(10):2897–906. doi: 10.1038/s41591-024-03243-9 (PMC11485252; doi:10.1038/s41591-024-03243-9), 2024-09-02
Supplement: 41591_2024_3243_MOESM1_ESM.pdf [file 41591_2024_3243_MOESM1_ESM.pdf]

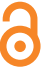

---

# Artificial intelligence guided screening for cardiomyopathies in an obstetric population: a pragmatic randomized clinical trial

---

In the format provided by the authors and unedited

---

# SUPPLEMENTAL APPENDIX

## Table of Contents

|                                                                                                                                                                                                             |    |
|-------------------------------------------------------------------------------------------------------------------------------------------------------------------------------------------------------------|----|
| INVESTIGATOR LIST .....                                                                                                                                                                                     | 2  |
| SUPPLEMENTAL FIGURES .....                                                                                                                                                                                  | 3  |
| Figure S1. Receiver operating characteristic for detection of cardiomyopathy (LVEF <50% A and LVEF <40% B.) using a digital stethoscope (maximum prediction) in an obstetric population in Nigeria. ....    | 4  |
| Figure S2. Receiver operating characteristic for detection of cardiomyopathy (LVEF <50% A and LVEF <40% B.) using the FDA cleared 12-lead AI-ECG model in an obstetric population in Nigeria. .             | 5  |
| Figure S3. Receiver operating characteristic for detection of cardiomyopathy (LVEF <50% A and LVEF <40% B.) using the original Mayo Clinic 12-lead AI-ECG model in an obstetric population in Nigeria. .... | 6  |
| Figure S4. Enrollment sites and participants .....                                                                                                                                                          | 7  |
| Figure S5. Digital stethoscope and chest recording location. ....                                                                                                                                           | 8  |
| Figure S6. Progression through the study visits stratified by clinical site and pregnancy status .....                                                                                                      | 9  |
| SUPPLEMENTAL TABLES .....                                                                                                                                                                                   | 10 |
| Table S1. Sensitivity Analysis for Secondary Outcomes – AI Enabled Digital Stethoscope in the Intervention Arm at Study Entry (n=587).....                                                                  | 10 |
| Table S2. Echocardiographic parameters at baseline visit for participants in the intervention arm .....                                                                                                     | 11 |
| Table S3. Demographic and clinical characteristics at baseline visit for participants in the intervention arm. ....                                                                                         | 12 |

## INVESTIGATOR LIST

*Mayo Clinic (Jacksonville, FL & Rochester, MN):* Demilade A. Adedinsewo, MD MPH; Andrea Carolina Morales-Lara, MD; KL Venkatachalam, MD; Jennifer Dugan, BA1; Xiaoxi Yao, PhD; Hanna J. Sledge, BS; Patrick W. Johnson, BS; Mikolaj A. Wieczorek, BS; Zachi I. Attia, PhD; Sabrina D. Phillips, MD; Mohamad H. Yamani, MD; Yvonne Butler Tobah, MD; Carl H. Rose, M; Emily E. Sharpe, MD; Francisco Lopez-Jimenez, MD, MBA; Paul A. Friedman, MD; Peter A. Noseworthy, MD; and Rickey E. Carter, PhD

*United Kingdom (Consultant):* Cynthia Yohanna, MD

*Lagos University Teaching Hospital (LUTH):* Bosede B. Afolabi, MBChB, Oyewole A. Kushimo, MBBS, Amam C. Mbakwem, MBBS, Ms. Damilola Onietan (lead study coordinator), Ms. Rachel Quao

*University College Ibadan (UCH):* Okechukwu S. Ogah, MBBS, Gbolahan Obajimi, MBBS, Mr. Solomon Aborisade, Ms. Oluwatosin Makinde, Ms. Victoria Ojo, Ms. Khadijat Adenike Olatunde, Dr. Olanike Allison Orimolade, Mr. Salawu Taofeek Oladotun, Mr. Oluwaseun Alabi, Dr. Akinsola Teslim Sanusi, Dr. Temitope Azeez Olukunle, Ms Ifeoluwa Alabede

*University of Illorin Teaching Hospital (UIITH):* Kehinde F. Ibiyemi, MBBS, Ayodele Ogunmodede, MBBS, Hadijat Olaide Raji, MBBS, Ms. Adeola Adedokun, Ms. Omowunmi Ishola, Prof. Munir'deen A. Ijaiya, Dr. Abiodun Adeniran

*Rasheed Shekoni Specialist Hospital (RSSH):* Sadiq H. Ringim, MBBS; Abdullahi A. Habib MBBS; Sabiu M. Hamza, MBBS, Mrs. Asma'u Abdullahi, Mrs. Rabi Musa

*Olabisi Onabanjo University Teaching Hospital (OOUTH):* Olusoji E. Jagun, MBBS, Francisca O. Inofomoh, MBChB, Adeolu Temitope, MBBS, Ms. Ajifola Temilola, Adedeji Adekolade, MBChB, Adeniyi Akiseku, MBChB

*Aminu Kano Teaching Hospital (AKTH):* Kamilu M. Karaye, BMBCH, Sule A. Gaya, MBBS, Isiaka Alfa, MBBS, Dr. Naser A Ishaq, Mr. Yahaya Sa'ad

## SUPPLEMENTAL FIGURES

**Figure S1** Receiver operating characteristic curves for detection of left ventricular systolic dysfunction (A- LVEF <50%, B- LVEF <40%) using a digital stethoscope (maximal prediction) in an obstetric population in Nigeria.

Panel A shows the receiver operating characteristic (ROC) curve for the digital stethoscope maximum model output (over the three recording positions acquired) for detecting a left ventricular ejection fraction (LVEF) < 50% while Panel B shows the ROC curve for detection of LVEF <40%. Diagnostic performance metrics are embedded within each image at the model operating point, which is denoted as the red circle on the ROC curve. Stethoscope recordings deemed to be of sufficient quality were used for assessing model performance. All recordings were obtained on the same day as the echocardiogram. AUC – Area under the curve, LRT – Likelihood ratio.

**Figure S2.** Receiver operating characteristic curve for detection of cardiomyopathy (LVEF <50% A and LVEF <40% B.) using the FDA cleared 12-lead AI-ECG in an obstetric population in Nigeria.

Panel A shows the receiver operating characteristic (ROC) curve for the FDA cleared 12-lead AI-ECG model output for detecting a left ventricular ejection fraction (LVEF) < 50% while Panel B shows the ROC curve for detection of LVEF <40%. Diagnostic performance metrics are embedded within each image at the model operating point, which is denoted as the red circle on the ROC curve. Only ECGs deemed to be of sufficient quality by the FDA cleared device were analyzed. All ECGs were obtained on the same day as the echocardiogram. AUC – Area under the curve, LRT – Likelihood ratio.

**Figure S3.** Receiver operating characteristic curve for detection of cardiomyopathy (LVEF <50% A and LVEF <40% B.) using the original Mayo Clinic 12-lead AI-ECG in an obstetric population in Nigeria.

Panel A shows the receiver operating characteristic (ROC) curve for the original Mayo Clinic 12-lead AI-ECG model output for detecting a left ventricular ejection fraction (LVEF) < 50% while Panel B shows the ROC curve for detection of LVEF <40%. Diagnostic performance metrics are embedded within each image at the model operating point, which is denoted as the red circle on the ROC curve. All ECGs were obtained on the same day as the echocardiogram. AUC – Area under the curve, LRT – Likelihood ratio.

**Figure S4.** Enrollment sites and participants

This figure shows participant enrollment sites along with total sample size enrolled at each location, with the entire state shaded in blue and study site locations displayed on the map of Nigeria.

**Figure S5.** Digital stethoscope and chest recording location

Panel A shows the digital stethoscope with ECG and phonocardiogram recording demonstrated on a smartphone. Panel B shows V2 and angled recording positions on the chest.

**Figure S6.** Progression through the study visits stratified by clinical site and pregnancy status

The figure shows the percentage of subjects completing the study protocol visits (up to 7) stratified by site and pregnancy status. The dashed line marks 50% the total number enrolled at each site. The median (Q1, Q3) number of visits completed was 2 (1, 3) for both the intervention and control arms. When broken down by pregnancy status, the median in the postpartum participants was 1 (1, 2) for both the intervention and control arm, and the participants pregnant at baseline had a median of 2 (1, 3) completed visits for each study arm.

**Figure S1. Receiver operating characteristic for detection of cardiomyopathy (LVEF <50% A and LVEF <40% B.) using a digital stethoscope (maximum prediction) in an obstetric population in Nigeria.**

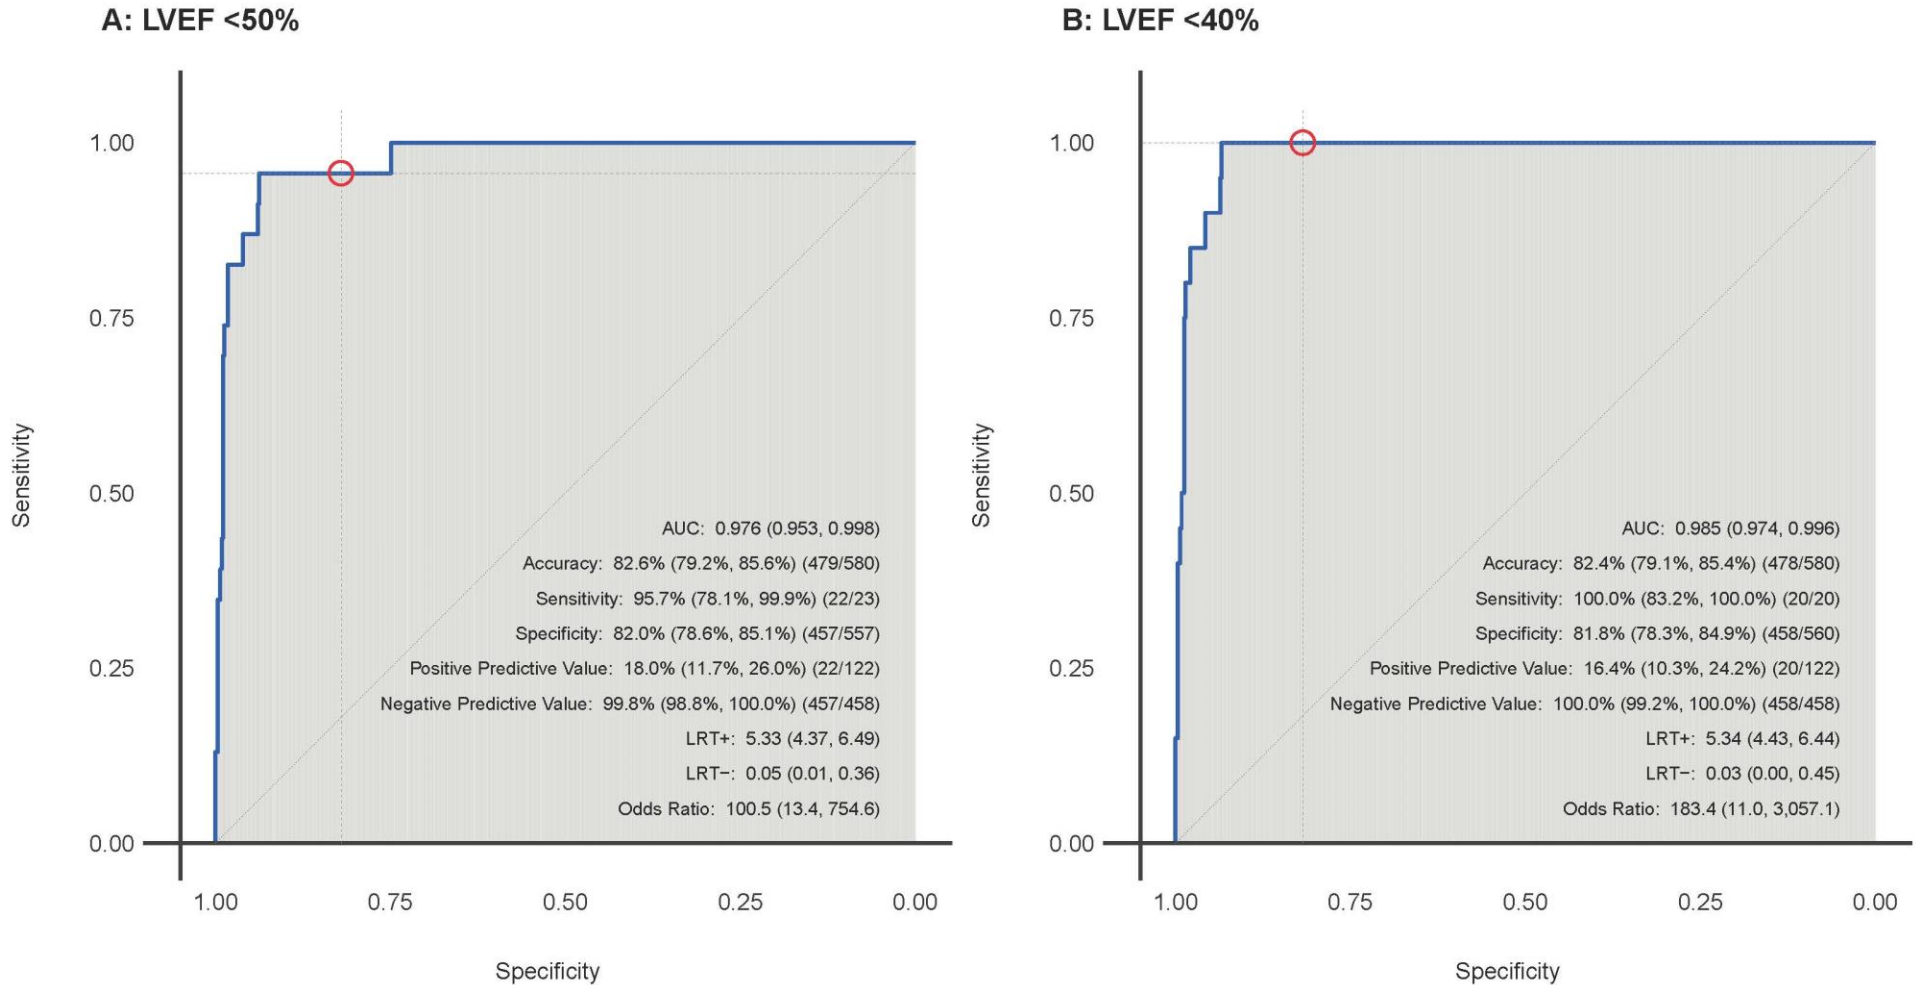

Panel A shows the receiver operating characteristic (ROC) curve for the digital stethoscope maximum model output (over the three recording positions acquired) for detecting a left ventricular ejection fraction (LVEF) < 50% while Panel B shows the ROC curve for detection of LVEF <40%. Diagnostic performance metrics are embedded within each image at the model operating point, which is denoted as the red circle on the ROC curve. Stethoscope recordings deemed to be of sufficient quality were used for assessing model performance. All recordings were obtained on the same day as the echocardiogram. AUC – Area under the curve, LRT – Likelihood ratio.

**Figure S2. Receiver operating characteristic for detection of cardiomyopathy (LVEF <50% A and LVEF <40% B.) using the FDA cleared 12-lead AI-ECG model in an obstetric population in Nigeria.**

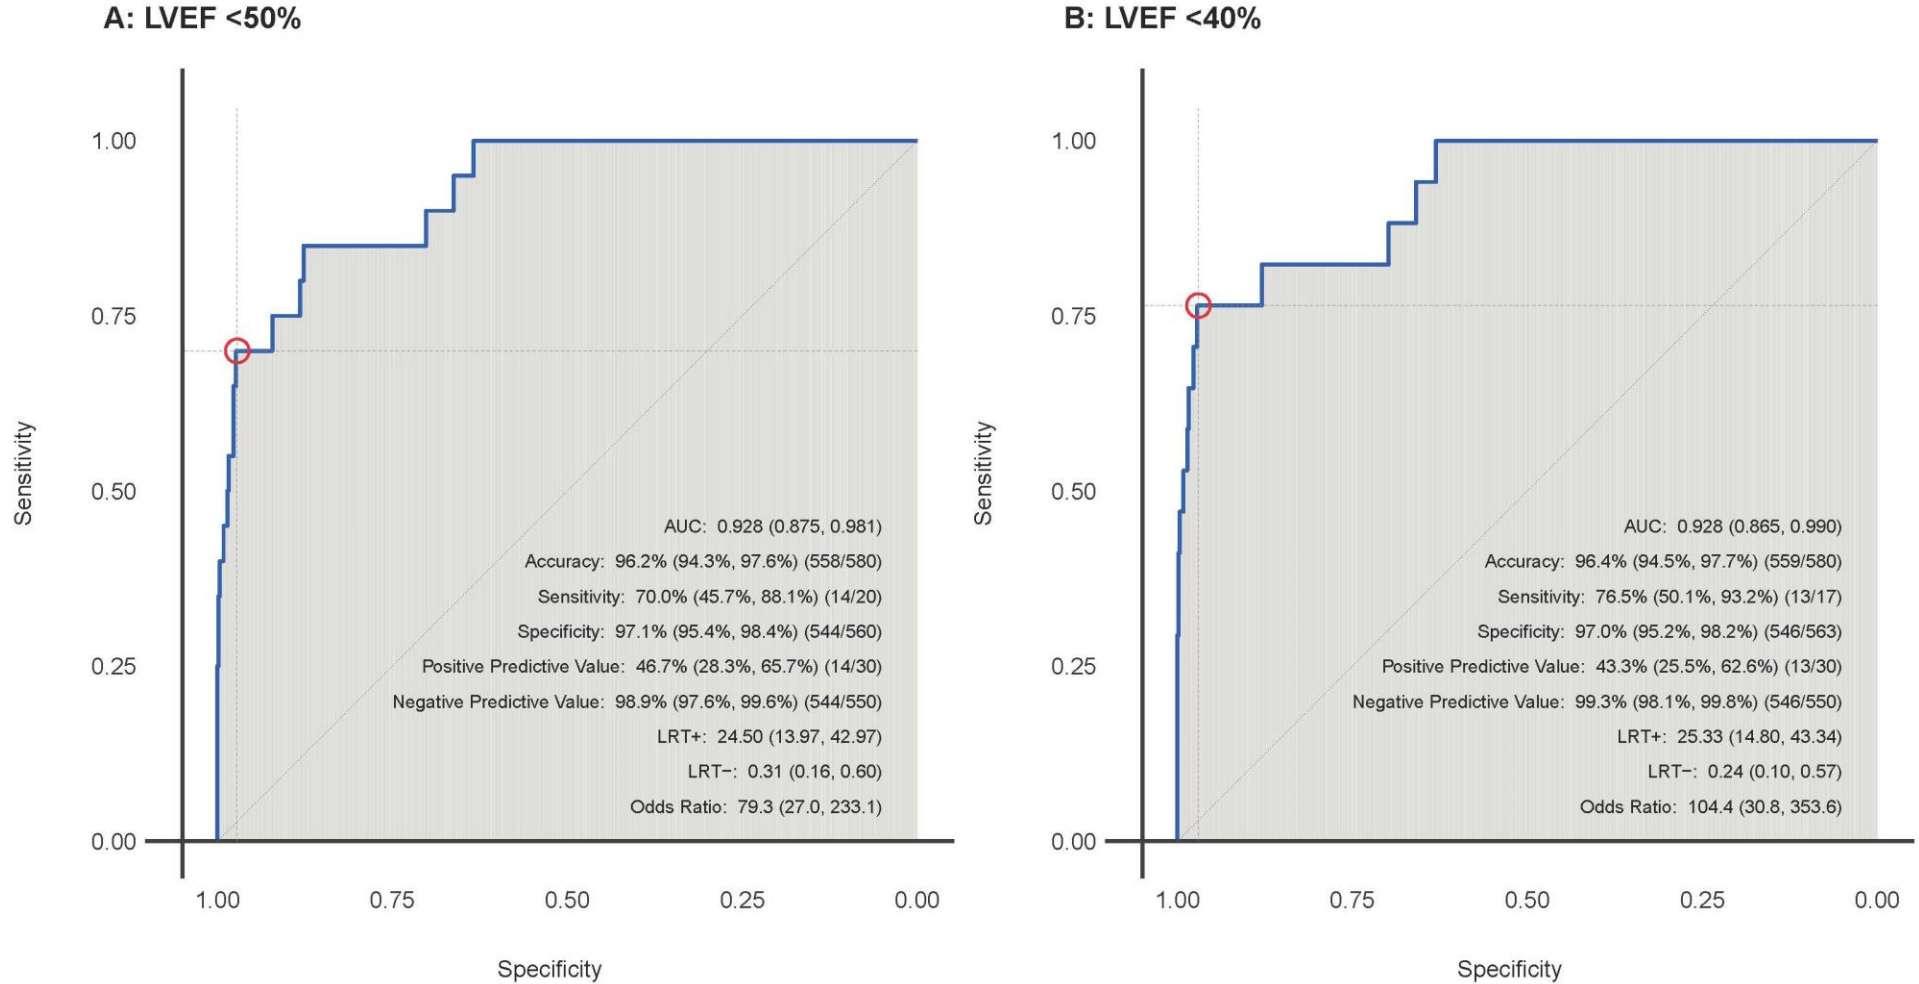

Panel A shows the receiver operating characteristic (ROC) curve for the FDA cleared 12-lead AI-ECG model output for detecting a left ventricular ejection fraction (LVEF) < 50% while Panel B shows the ROC curve for detection of LVEF <40%. Diagnostic performance metrics are embedded within each image at the model operating point, which is denoted as the red circle on the ROC curve. Only ECGs deemed to be of sufficient quality by the FDA cleared device were analyzed. All ECGs were obtained on the same day as the echocardiogram. AUC – Area under the curve, LRT – Likelihood ratio.

**Figure S3. Receiver operating characteristic for detection of cardiomyopathy (LVEF <50% A and LVEF <40% B.) using the original Mayo Clinic 12-lead AI-ECG model in an obstetric population in Nigeria.**

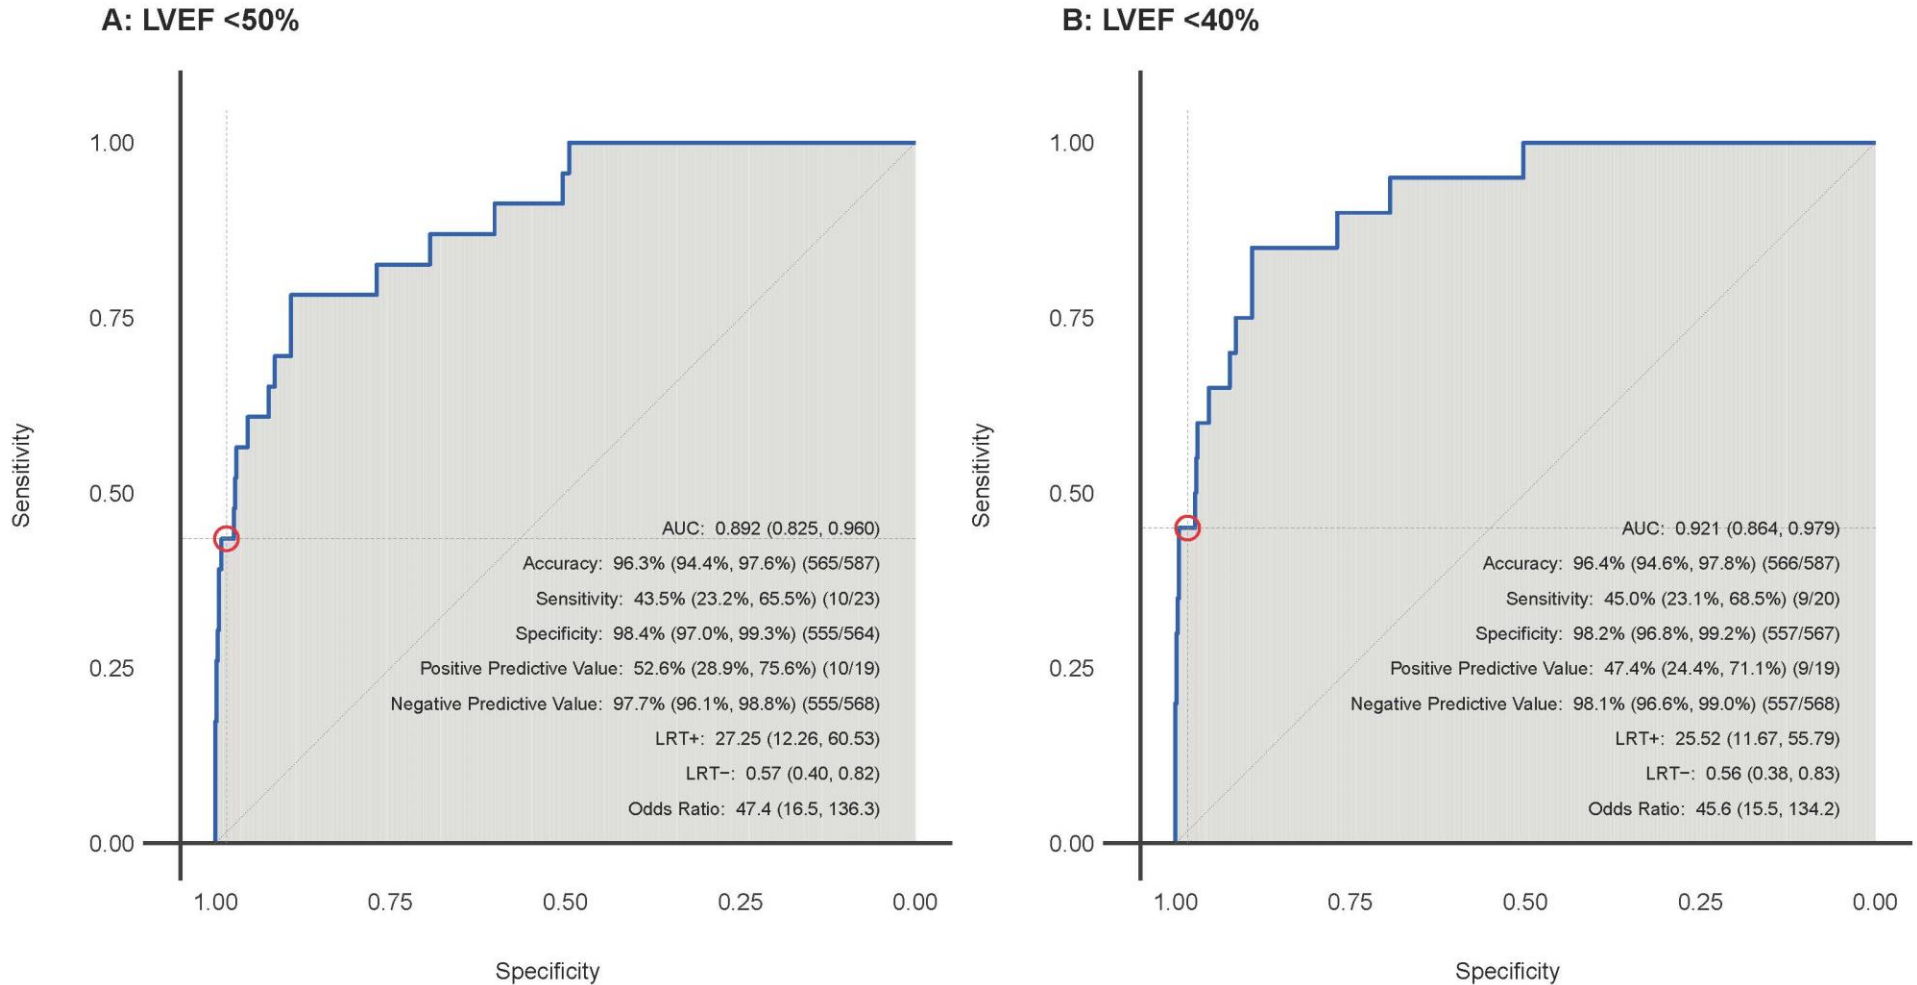

Panel A shows the receiver operating characteristic (ROC) curve for the original Mayo Clinic 12-lead AI-ECG model output for detecting a left ventricular ejection fraction (LVEF) < 50% while Panel B shows the ROC curve for detection of LVEF <40%. Diagnostic performance metrics are embedded within each image at the model operating point, which is denoted as the red circle on the ROC curve. All ECGs were obtained on the same day as the echocardiogram. AUC – Area under the curve, LRT – Likelihood ratio.

**Figure S4. Enrollment sites and participants**

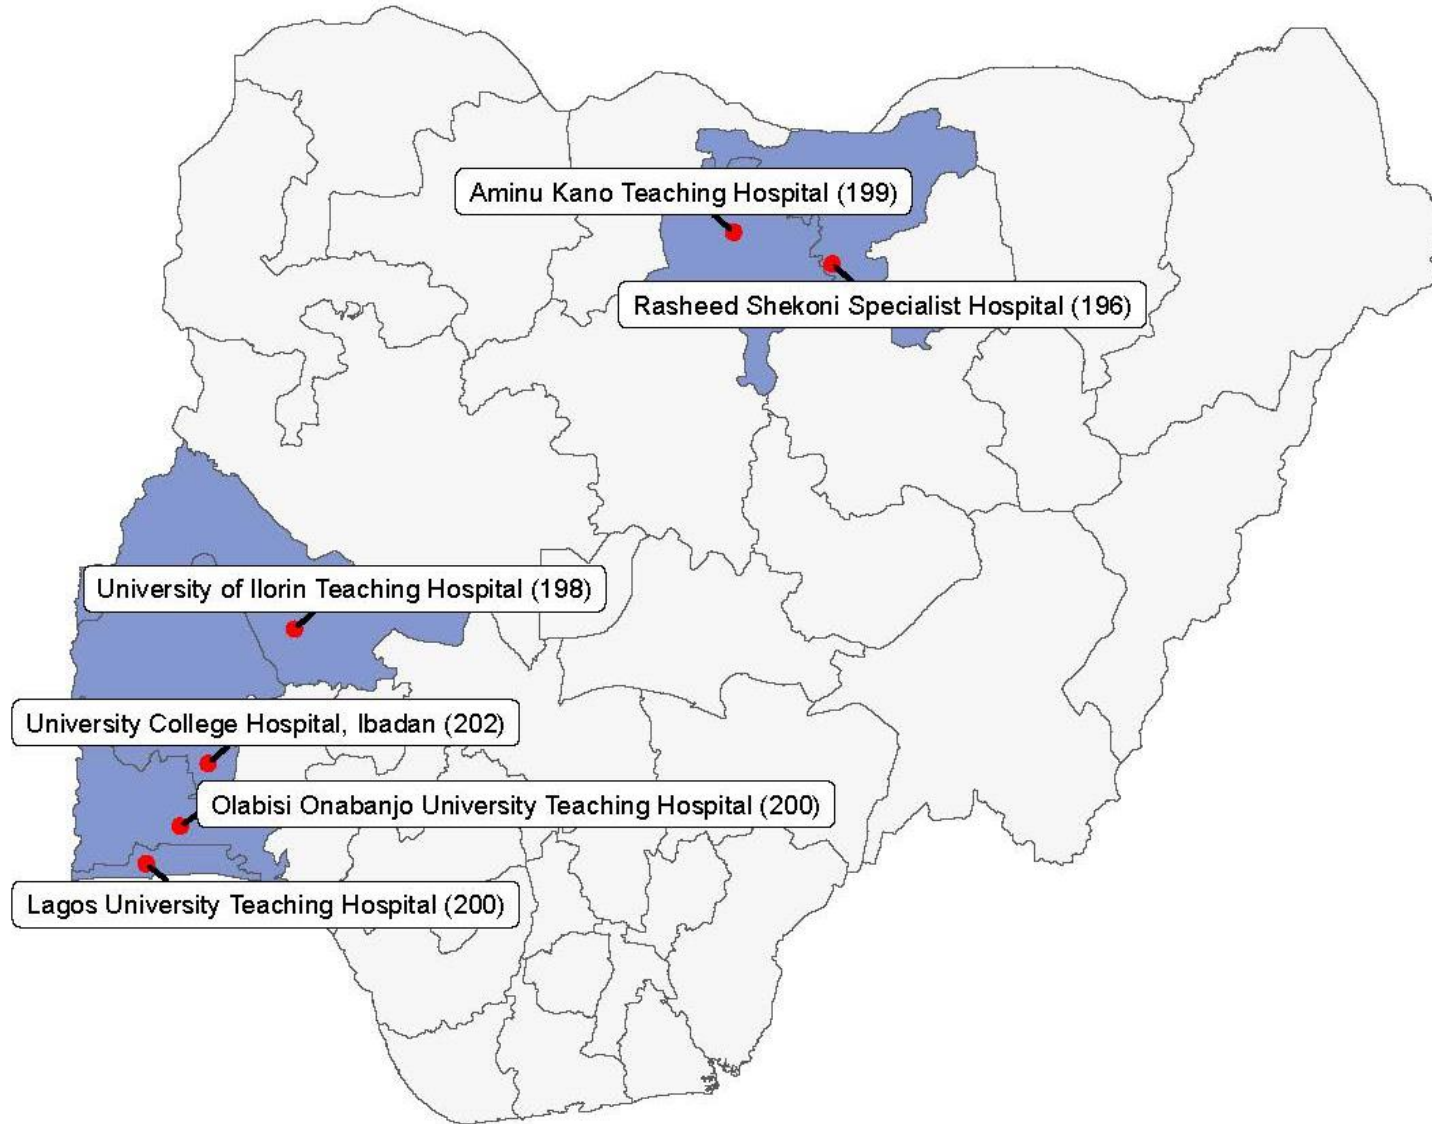

This figure shows participant enrollment sites along with total sample size enrolled at each location, with the entire state shaded in blue and study site locations displayed on the map of Nigeria.



**Figure S5. Digital stethoscope and chest recording location.**

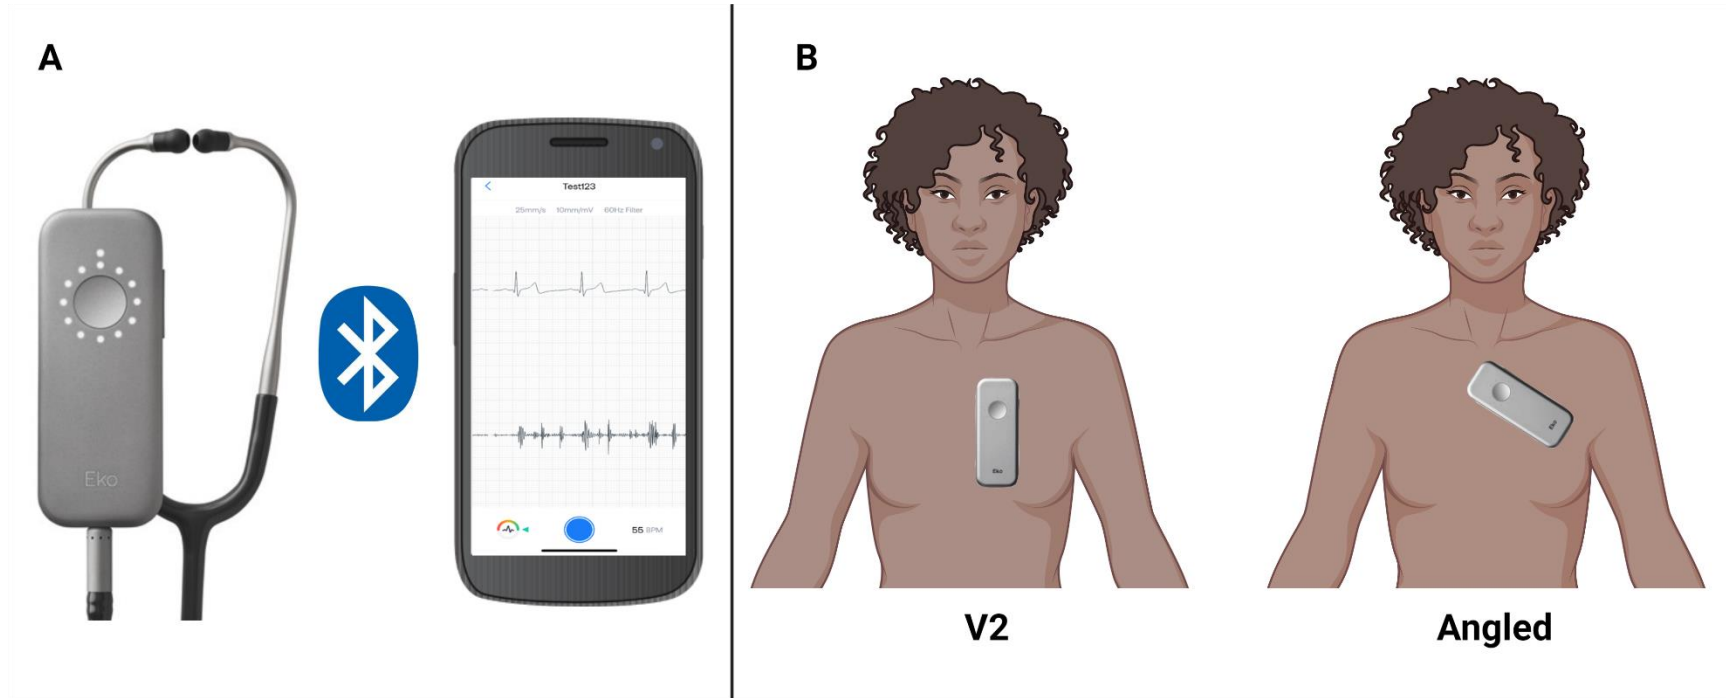

Panel A shows the digital stethoscope with ECG and phonocardiogram recording demonstrated on a smartphone. Panel B shows V2 and angled recording positions on the chest. Figure illustration created using biorender.com.

**Figure S6. Progression through the study visits stratified by clinical site and pregnancy status**

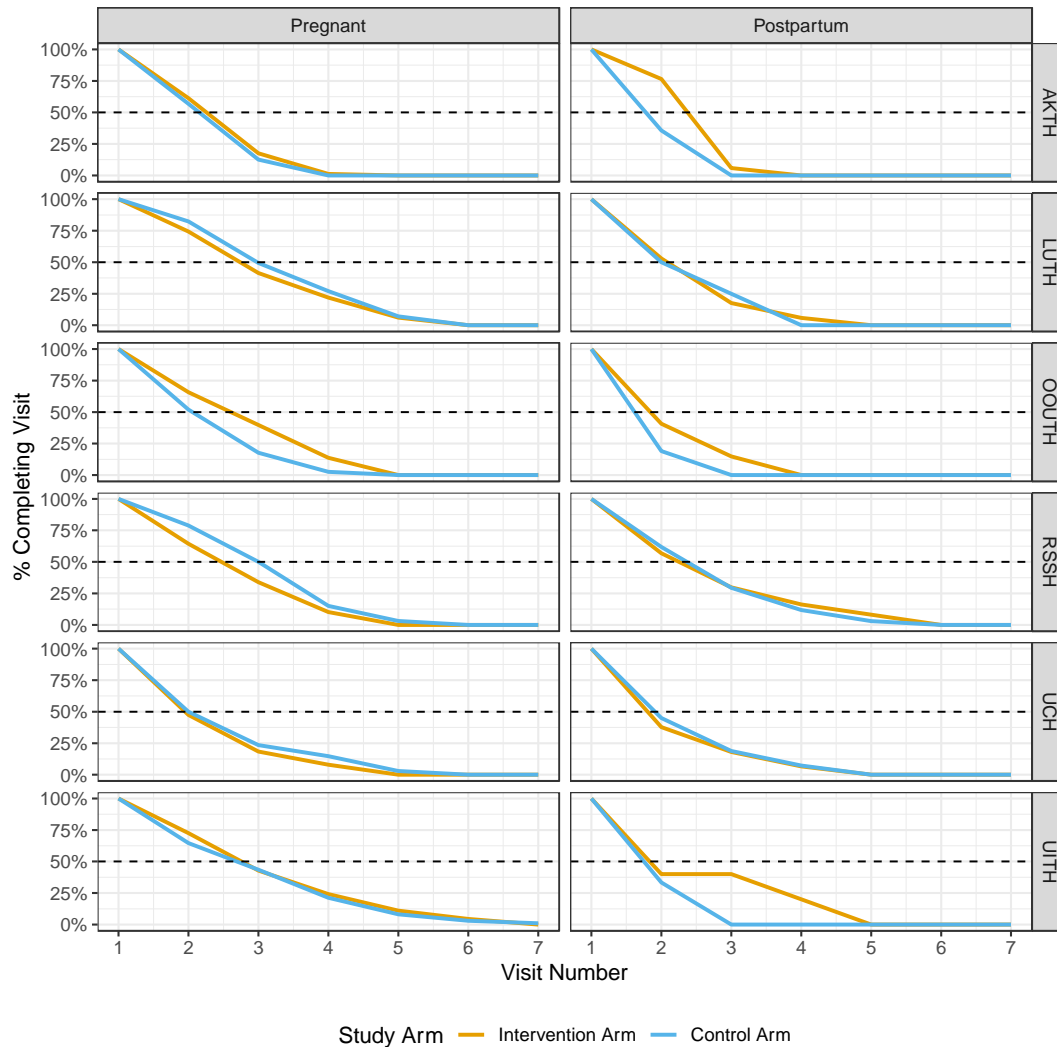

The figure shows the percentage of subjects completing the study protocol visits (up to 7) stratified by site and pregnancy status. The dashed line marks 50% the total number enrolled at each site. The median (Q1, Q3) number of visits completed was 2 (1, 3) for both the intervention and control arms. When broken down by pregnancy status, the median in the postpartum participants was 1 (1, 2) for both the intervention and control arm, and the participants pregnant at baseline had a median of 2 (1, 3) completed visits for each study arm. Abbreviations: AKTH, Aminu Kano Teaching Hospital; LUTH, Lagos University Teaching Hospital; OOUTH, Olabisi Onabanjo University Teaching Hospital; RSSH, Rasheed Shekoni Specialist Hospital; UCH, University College Hospital, Ibadan; UITH, University of Ilorin Teaching Hospital; Q1, 25<sup>th</sup> percentile or first quartile; Q3, 75<sup>th</sup> percentile or third quartile.

## SUPPLEMENTAL TABLES

**Table S1. Sensitivity Analysis for Secondary Outcomes – AI Enabled Digital Stethoscope in the Intervention Arm at Study Entry (n=587)**

| Outcome   | Model (threshold)     | N       | AUC                  | Sensitivity                  | Specificity                  | Positive Predictive Value   | Negative Predictive Value      |
|-----------|-----------------------|---------|----------------------|------------------------------|------------------------------|-----------------------------|--------------------------------|
| LVEF ≤35% | Angled (0.43)         | 581/587 | 0.970 (0.937, 1.000) | 94.1% (71.3%, 99.9%) 16/17   | 89.7% (86.9%, 92.1%) 506/564 | 21.6% (12.9%, 32.7%) 16/74  | 99.8% (98.9%, 100.0%) 506/507  |
|           | V2 (0.43)             | 582/587 | 0.960 (0.927, 0.992) | 94.1% (71.3%, 99.9%) 16/17   | 86.4% (83.3%, 89.1%) 488/565 | 17.2% (10.2%, 26.4%) 16/93  | 99.8% (98.9%, 100.0%) 488/489  |
|           | Handheld (0.43)       | 572/587 | 0.968 (0.946, 0.990) | 70.6% (44.0%, 89.7%) 12/17   | 95.0% (92.8%, 96.6%) 527/555 | 30.0% (16.6%, 46.5%) 12/40  | 99.1% (97.8%, 99.7%) 527/532   |
|           | Max Prediction (0.43) | 587/587 | 0.982 (0.968, 0.997) | 100.0% (80.5%, 100.0%) 17/17 | 78.8% (75.2%, 82.1%) 449/570 | 12.3% (7.3%, 19.0%) 17/138  | 100.0% (99.2%, 100.0%) 449/449 |
| LVEF <40% | Angled (0.43)         | 581/587 | 0.975 (0.946, 1.000) | 95.0% (75.1%, 99.9%) 19/20   | 90.2% (87.4%, 92.5%) 506/561 | 25.7% (16.2%, 37.2%) 19/74  | 99.8% (98.9%, 100.0%) 506/507  |
|           | V2 (0.43)             | 582/587 | 0.960 (0.932, 0.988) | 95.0% (75.1%, 99.9%) 19/20   | 86.8% (83.8%, 89.5%) 488/562 | 20.4% (12.8%, 30.1%) 19/93  | 99.8% (98.9%, 100.0%) 488/489  |
|           | Handheld (0.43)       | 572/587 | 0.956 (0.928, 0.985) | 65.0% (40.8%, 84.6%) 13/20   | 95.1% (93.0%, 96.8%) 525/552 | 32.5% (18.6%, 49.1%) 13/40  | 98.7% (97.3%, 99.5%) 525/532   |
|           | Max Prediction (0.43) | 587/587 | 0.983 (0.970, 0.996) | 100.0% (83.2%, 100.0%) 20/20 | 79.2% (75.6%, 82.5%) 449/567 | 14.5% (9.1%, 21.5%) 20/138  | 100.0% (99.2%, 100.0%) 449/449 |
| LVEF <45% | Angled (0.43)         | 581/587 | 0.961 (0.928, 0.994) | 87.0% (66.4%, 97.2%) 20/23   | 90.3% (87.6%, 92.6%) 504/558 | 27.0% (17.4%, 38.6%) 20/74  | 99.4% (98.3%, 99.9%) 504/507   |
|           | V2 (0.43)             | 582/587 | 0.958 (0.930, 0.986) | 91.3% (72.0%, 98.9%) 21/23   | 87.1% (84.1%, 89.8%) 487/559 | 22.6% (14.6%, 32.4%) 21/93  | 99.6% (98.5%, 100.0%) 487/489  |
|           | Handheld (0.43)       | 572/587 | 0.931 (0.892, 0.970) | 56.5% (34.5%, 76.8%) 13/23   | 95.1% (92.9%, 96.7%) 522/549 | 32.5% (18.6%, 49.1%) 13/40  | 98.1% (96.6%, 99.1%) 522/532   |
|           | Max Prediction (0.43) | 587/587 | 0.973 (0.947, 0.998) | 95.7% (78.1%, 99.9%) 22/23   | 79.4% (75.9%, 82.7%) 448/564 | 15.9% (10.3%, 23.1%) 22/138 | 99.8% (98.8%, 100.0%) 448/449  |
| LVEF <50% | Angled (0.43)         | 581/587 | 0.961 (0.928, 0.994) | 87.0% (66.4%, 97.2%) 20/23   | 90.3% (87.6%, 92.6%) 504/558 | 27.0% (17.4%, 38.6%) 20/74  | 99.4% (98.3%, 99.9%) 504/507   |
|           | V2 (0.43)             | 582/587 | 0.958 (0.930, 0.986) | 91.3% (72.0%, 98.9%) 21/23   | 87.1% (84.1%, 89.8%) 487/559 | 22.6% (14.6%, 32.4%) 21/93  | 99.6% (98.5%, 100.0%) 487/489  |
|           | Handheld (0.43)       | 572/587 | 0.931 (0.892, 0.970) | 56.5% (34.5%, 76.8%) 13/23   | 95.1% (92.9%, 96.7%) 522/549 | 32.5% (18.6%, 49.1%) 13/40  | 98.1% (96.6%, 99.1%) 522/532   |
|           | Max Prediction (0.43) | 587/587 | 0.973 (0.947, 0.998) | 95.7% (78.1%, 99.9%) 22/23   | 79.4% (75.9%, 82.7%) 448/564 | 15.9% (10.3%, 23.1%) 22/138 | 99.8% (98.8%, 100.0%) 448/449  |

The results provided in this table are based on baseline assessments only where all participants in the intervention arm had a confirmatory echocardiogram done for validation of AI model performance. All results include digital stethoscope recordings acquired on the same day as the echocardiogram.

The Angled, V2, Handheld models are based on the digital stethoscope recordings. The max prediction is derived as the maximum model output across the three recording positions (i.e., any positive prediction). The model and operating cut point of 0.43 were developed to detect an LVEF <40%. This table provides a sensitivity analysis that retains all data points including poor-quality digital stethoscope recordings.

LVEF, left ventricular ejection fraction, US FDA, United States Food and Drug Administration.

**Table S2. Echocardiographic parameters at baseline visit for participants in the intervention arm**

| Characteristic                           | N   | Median (Q1 - Q3) or No. (%) of patients |                        |                        | P-value |
|------------------------------------------|-----|-----------------------------------------|------------------------|------------------------|---------|
|                                          |     | Overall (N=587)                         | LVEF<50% (N=23)        | LVEF≥50% (N=564)       |         |
| Baseline LVEF %                          | 587 | 61.00 (56.75-65.20)                     | 24.50 (21.50-32.75)    | 61.00 (57.00-66.00)    | <0.001  |
| Cardiac Output (L/m)                     | 564 | 5.36 (4.00-6.78)                        | 3.90 (2.95-5.30)       | 5.40 (4.10-6.87)       | <0.001  |
| Cardiac Index (L/min/m2)                 | 564 | 3.00 (2.32-3.85)                        | 2.49 (1.95-3.62)       | 3.02 (2.33-3.85)       | 0.035   |
| LVEDD (mm)                               | 587 | 46.80 (43.00-50.00)                     | 60.00 (57.00-66.00)    | 46.13 (42.71-49.63)    | <0.001  |
| LVESD (mm)                               | 587 | 31.80 (29.00-34.50)                     | 53.00 (49.00-58.65)    | 31.18 (29.00-34.00)    | <0.001  |
| Septal thickness in mm                   | 587 | 8.30 (7.20-9.70)                        | 7.80 (7.00-8.60)       | 8.30 (7.20-9.82)       | 0.019   |
| Posterior wall thickness in mm           | 587 | 8.00 (7.10-10.00)                       | 8.00 (7.00-8.75)       | 8.03 (7.16-10.00)      | 0.12    |
| LAVI (ml/m2)                             | 580 | 27.84 (21.74-34.70)                     | 44.30 (39.28-64.53)    | 27.30 (21.30-34.00)    | <0.001  |
| RAVI (ml/m2)                             | 472 | 22.00 (16.78-27.83)                     | 38.00 (29.65-55.06)    | 21.90 (16.50-27.00)    | <0.001  |
| Left ventricular mass (g)                | 584 | 131.00 (105.77-159.06)                  | 177.00 (150.00-237.00) | 130.00 (104.00-158.00) | <0.001  |
| LVMI (g/m2)                              | 584 | 75.00 (61.58-90.84)                     | 113.00 (96.50-146.00)  | 73.12 (61.00-89.40)    | <0.001  |
| Left ventricular RWT (%)                 | 585 | 0.36 (0.31-0.42)                        | 0.25 (0.20-0.30)       | 0.36 (0.31-0.43)       | <0.001  |
| LV longitudinal peak systolic strain (%) | 164 | -18.35 (-20.60--16.08)                  | -9.20 (-9.20--9.20)    | -18.40 (-20.60--16.15) | 0.087   |
| TAPSE (mm)                               | 561 | 23.90 (20.80-26.60)                     | 18.00 (14.20-19.40)    | 24.00 (21.00-26.90)    | <0.001  |
| TR velocity (m/sec)                      | 170 | 2.02 (1.54-2.50)                        | 3.11 (2.80-3.28)       | 1.95 (1.50-2.32)       | <0.001  |
| E wave velocity (m/sec)                  | 583 | 0.87 (0.71-1.00)                        | 1.09 (0.91-1.31)       | 0.86 (0.71-0.99)       | <0.001  |
| A wave velocity (m/sec)                  | 554 | 0.59 (0.49-0.68)                        | 0.41 (0.34-0.63)       | 0.59 (0.49-0.69)       | 0.009   |
| e' velocity (m/sec)                      | 577 | 0.11 (0.09-0.13)                        | 0.07 (0.06-0.09)       | 0.11 (0.09-0.13)       | <0.001  |
| E/e' ratio                               | 578 | 7.72 (6.32-9.64)                        | 14.70 (11.10-17.00)    | 7.60 (6.25-9.43)       | <0.001  |
| VHD (left sided)                         | 587 | 16 (2.7%)                               | 12 (52.2%)             | 4 (0.7%)               | <0.001  |
| VHD (right sided)                        | 587 | 45 (7.7%)                               | 11 (47.8%)             | 34 (6.0%)              | <0.001  |

P-values result from a Wilcoxon rank sum test (continuous variables) or Chi-Square test (categorical variables) evaluated at the alpha = 0.05 level of significance (two-sided). No adjustments for multiple comparison were performed.

\*GLS – global longitudinal peak systolic strain, LAVI- Left atrial volume index LVEDD - Left ventricular end diastolic diameter, LVESD - Left ventricular end systolic diameter, LVMI - Left ventricular mass index, RAVI - Left atrial volume index, RWT - relative wall thickness, TR – Tricuspid regurgitation, VHD -Valvular heart disease (moderate or severe stenosis or regurgitation, left sided VDH includes mitral valve, aortic valves and right sided VHD includes tricuspid, pulmonic valves); TAPSE -Tricuspid Annular Plane Systolic Excursion Using M-Mode.

**Table S3. Demographic and clinical characteristics at baseline visit for participants in the intervention arm.**

| Characteristic                                           | N   | Median (Q1 - Q3) or No. (%) of patients |                 |                  | P-value |
|----------------------------------------------------------|-----|-----------------------------------------|-----------------|------------------|---------|
|                                                          |     | Overall (N=587)                         | LVEF<50% (N=23) | LVEF≥50% (N=564) |         |
| Age, years                                               | 587 | 31 (27-35)                              | 30 (24-34)      | 31 (27-35)       | 0.20    |
| Race (Black)                                             | 587 | 587 (100.0%)                            | 23 (100.0%)     | 564 (100.0%)     |         |
| Ethnicity                                                | 587 |                                         |                 |                  | <0.001  |
| Hausa                                                    |     | 163 (27.8%)                             | 16 (69.6%)      | 147 (26.1%)      |         |
| Igbo                                                     |     | 61 (10.4%)                              | 0 (0.0%)        | 61 (10.8%)       |         |
| Other                                                    |     | 35 (6.0%)                               | 2 (8.7%)        | 33 (5.9%)        |         |
| Yoruba                                                   |     | 328 (55.9%)                             | 5 (21.7%)       | 323 (57.3%)      |         |
| Status at Entry                                          | 587 |                                         |                 |                  | <0.001  |
| Pregnant                                                 |     | 423 (72.1%)                             | 2 (8.7%)        | 421 (74.6%)      |         |
| Postpartum                                               |     | 164 (27.9%)                             | 21 (91.3%)      | 143 (25.4%)      |         |
| Timepoint of Pregnancy/Postpartum                        | 587 |                                         |                 |                  | <0.001  |
| First trimester                                          |     | 37 (6.3%)                               | 0 (0.0%)        | 37 (6.6%)        |         |
| Second trimester                                         |     | 150 (25.6%)                             | 1 (4.3%)        | 149 (26.4%)      |         |
| Third trimester                                          |     | 238 (40.5%)                             | 0 (0.0%)        | 238 (42.2%)      |         |
| Time of delivery or up to 6 weeks after delivery         |     | 116 (19.8%)                             | 9 (39.1%)       | 107 (19.0%)      |         |
| Greater than 6 weeks and up to 3 months after delivery   |     | 23 (3.9%)                               | 6 (26.1%)       | 17 (3.0%)        |         |
| Greater than 3 months and up to 5 months after delivery  |     | 7 (1.2%)                                | 1 (4.3%)        | 6 (1.1%)         |         |
| Greater than 5 months and up to 12 months after delivery |     | 16 (2.7%)                               | 6 (26.1%)       | 10 (1.8%)        |         |
| Weight, kg                                               | 587 | 70 (60-81)                              | 51 (49-59)      | 70 (61-82)       | <0.001  |
| Height, cm                                               | 587 | 161 (157-165)                           | 159 (155-163)   | 161 (157-165)    | 0.048   |
| Systolic Blood Pressure, mmHg                            | 587 | 110 (100-120)                           | 100 (100-118)   | 110 (100-120)    | 0.13    |
| Diastolic Blood Pressure, mmHg                           | 587 | 70 (60-80)                              | 70 (60-88)      | 70 (60-80)       | 0.41    |
| Resting Heart Rate, bpm                                  | 587 | 87 (80-95)                              | 105 (97-112)    | 86 (80-94)       | <0.001  |
| Hemoglobin (g/dL)                                        | 516 | 11 (10-12)                              | 10 (9-11)       | 11 (10-12)       | 0.023   |
| Hematocrit (%)                                           | 534 | 33 (30-35)                              | 31 (28-33)      | 33 (30-35)       | 0.038   |
| Blood type                                               | 553 |                                         |                 |                  | 0.74    |
| A                                                        |     | 98 (17.7%)                              | 3 (14.3%)       | 95 (17.9%)       |         |
| B                                                        |     | 106 (19.2%)                             | 5 (23.8%)       | 101 (19.0%)      |         |
| AB                                                       |     | 29 (5.2%)                               | 2 (9.5%)        | 27 (5.1%)        |         |
| O                                                        |     | 320 (57.9%)                             | 11 (52.4%)      | 309 (58.1%)      |         |
| Hemoglobin Genotype                                      | 553 |                                         |                 |                  | 0.63    |
| AA                                                       |     | 402 (72.7%)                             | 16 (84.2%)      | 386 (72.3%)      |         |
| AS                                                       |     | 131 (23.7%)                             | 2 (10.5%)       | 129 (24.2%)      |         |

| Characteristic                  | N   | Overall<br>(N=587) | Median (Q1 - Q3) or No. (%) of patients |                     | P-value |
|---------------------------------|-----|--------------------|-----------------------------------------|---------------------|---------|
|                                 |     |                    | LVEF<50%<br>(N=23)                      | LVEF≥50%<br>(N=564) |         |
| SS                              |     | 5 (0.9%)           | 0 (0.0%)                                | 5 (0.9%)            |         |
| Sc                              |     | 1 (0.2%)           | 0 (0.0%)                                | 1 (0.2%)            |         |
| Other                           |     | 14 (2.5%)          | 1 (5.3%)                                | 13 (2.4%)           |         |
| Infectious Screen               |     |                    |                                         |                     |         |
| HIV                             | 587 | 7 (1.2%)           | 0 (0.0%)                                | 7 (1.2%)            | 1.00    |
| Hepatitis C                     | 587 | 3 (0.5%)           | 0 (0.0%)                                | 3 (0.5%)            | 1.00    |
| Syphilis                        | 587 | 4 (0.7%)           | 0 (0.0%)                                | 4 (0.7%)            | 1.00    |
| Hepatitis B                     | 587 | 9 (1.5%)           | 0 (0.0%)                                | 9 (1.6%)            | 1.00    |
| Urinalysis positive for protein | 565 | 61 (10.8%)         | 6 (31.6%)                               | 55 (10.1%)          | 0.010   |

P-values result from a Wilcoxon rank sum test (continuous variables) or Chi-Square test (categorical variables) evaluated at the alpha = 0.05 level of significance (two- sided).

No adjustments for multiple comparison were performed.

HIV -Human immunodeficiency virus.

## CONSORT-AI checklist of information to include when reporting a randomised trials of AI interventions

| Section                          | Item | CONSORT 2010 Item <sup>a</sup>                                                                                                        | CONSORT-AI Item               | Addressed on Page No <sup>b</sup>                                                                                                                                                       |              |
|----------------------------------|------|---------------------------------------------------------------------------------------------------------------------------------------|-------------------------------|-----------------------------------------------------------------------------------------------------------------------------------------------------------------------------------------|--------------|
| Title and Abstract               |      |                                                                                                                                       |                               |                                                                                                                                                                                         |              |
| <b>Title and Abstract</b>        | 1a   | Identification as a randomised trial in the title                                                                                     | CONSORT-AI 1a,b Elaboration   | (i) Indicate that the intervention involves artificial intelligence/machine learning in the title and/or abstract and specify the type of model.                                        | 1            |
|                                  | 1b   | Structured summary of trial design, methods, results, and conclusions (for specific guidance see CONSORT for abstracts)               |                               | (ii) State the intended use of the AI intervention within the trial in the title and/or abstract.                                                                                       | 3            |
| Introduction                     |      |                                                                                                                                       |                               |                                                                                                                                                                                         |              |
| <b>Background and objectives</b> | 2a   | Scientific background and explanation of rationale                                                                                    | CONSORT-AI 2a (i) Extension   | Explain the intended use of the AI intervention in the context of the clinical pathway, including its purpose and its intended users (e.g. healthcare professionals, patients, public). | 4,5          |
|                                  | 2b   | Specific objectives or hypotheses                                                                                                     |                               |                                                                                                                                                                                         | 4,5          |
| Methods                          |      |                                                                                                                                       |                               |                                                                                                                                                                                         |              |
| <b>Trial design</b>              | 3a   | Description of trial design (such as parallel, factorial) including allocation ratio                                                  |                               |                                                                                                                                                                                         | 34-36        |
|                                  | 3b   | Important changes to methods after trial commencement (such as eligibility criteria), with reasons                                    |                               |                                                                                                                                                                                         | 40-41        |
| <b>Participants</b>              | 4a   | Eligibility criteria for participants                                                                                                 | CONSORT-AI 4a (i) Elaboration | State the inclusion and exclusion criteria at the level of participants.                                                                                                                | 35           |
|                                  |      |                                                                                                                                       | CONSORT-AI 4a (ii) Extension  | State the inclusion and exclusion criteria at the level of the input data.                                                                                                              | 37-38, 39-40 |
|                                  | 4b   | Settings and locations where the data were collected                                                                                  | CONSORT-AI 4b Extension       | Describe how the AI intervention was integrated into the trial setting, including any onsite or offsite requirements.                                                                   | 35-37        |
| <b>Interventions</b>             | 5    | The interventions for each group with sufficient details to allow replication, including how and when they were actually administered | CONSORT-AI 5 (i) Extension    | State which version of the AI algorithm was used.                                                                                                                                       | 37           |
|                                  |      |                                                                                                                                       | CONSORT-AI 5 (ii) Extension   | Describe how the input data were acquired and selected for the AI intervention.                                                                                                         | 36-37        |
|                                  |      |                                                                                                                                       | CONSORT-AI 5 (iii) Extension  | Describe how poor quality or unavailable input data were assessed and handled.                                                                                                          | 37-38, 39-40 |
|                                  |      |                                                                                                                                       | CONSORT-AI 5 (iv) Extension.  | Specify whether there was human-AI interaction in the handling of the input data, and what level of expertise was required of users.                                                    | 36-37        |

Cite as:

|                                                                |     |                                                                                                                                                                                             |                             |                                                                                                                  |       |
|----------------------------------------------------------------|-----|---------------------------------------------------------------------------------------------------------------------------------------------------------------------------------------------|-----------------------------|------------------------------------------------------------------------------------------------------------------|-------|
|                                                                |     |                                                                                                                                                                                             | CONSORT-AI 5 (v) Extension  | Specify the output of the AI intervention                                                                        | 36    |
|                                                                |     |                                                                                                                                                                                             | CONSORT-AI 5 (vi) Extension | Explain how the AI intervention's outputs contributed to decision-making or other elements of clinical practice. | 36-37 |
| <b>Outcomes</b>                                                | 6a  | Completely defined pre-specified primary and secondary outcome measures, including how and when they were assessed                                                                          |                             |                                                                                                                  | 38-40 |
|                                                                | 6b  | Any changes to trial outcomes after the trial commenced, with reasons                                                                                                                       |                             |                                                                                                                  | N/A   |
| <b>Sample size</b>                                             | 7a  | How sample size was determined                                                                                                                                                              |                             |                                                                                                                  | 40-41 |
|                                                                | 7b  | When applicable, explanation of any interim analyses and stopping guidelines                                                                                                                |                             |                                                                                                                  | N/A   |
| <b>Randomisation</b>                                           |     |                                                                                                                                                                                             |                             |                                                                                                                  |       |
| <b>Sequence generation</b>                                     | 8a  | Method used to generate the random allocation sequence                                                                                                                                      |                             |                                                                                                                  | 35    |
|                                                                | 8b  | Type of randomisation; details of any restriction (such as blocking and block size)                                                                                                         |                             |                                                                                                                  | 35    |
| <b>Allocation concealment mechanism</b>                        | 9   | Mechanism used to implement the random allocation sequence (such as sequentially numbered containers), describing any steps taken to conceal the sequence until interventions were assigned |                             |                                                                                                                  | 35    |
| <b>Implementation</b>                                          | 10  | Who generated the random allocation sequence, who enrolled participants, and who assigned participants to interventions                                                                     |                             |                                                                                                                  | 35    |
| <b>Blinding</b>                                                | 11a | If done, who was blinded after assignment to interventions (for example, participants, care providers, those assessing outcomes) and how                                                    |                             |                                                                                                                  | N/A   |
|                                                                | 11b | If relevant, description of the similarity of interventions                                                                                                                                 |                             |                                                                                                                  | 35-38 |
| <b>Statistical methods</b>                                     | 12a | Statistical methods used to compare groups for primary and secondary outcomes                                                                                                               |                             |                                                                                                                  | 40-42 |
|                                                                | 12b | Methods for additional analyses, such as subgroup analyses and adjusted analyses                                                                                                            |                             |                                                                                                                  | 40-42 |
| <b>Results</b>                                                 |     |                                                                                                                                                                                             |                             |                                                                                                                  |       |
| <b>Participant flow</b><br>(a diagram is strongly recommended) | 13a | For each group, the numbers of participants who were randomly assigned, received intended treatment, and were analysed for the primary outcome                                              |                             |                                                                                                                  | 6     |
|                                                                | 13b | For each group, losses and exclusions after randomisation, together with reasons                                                                                                            |                             |                                                                                                                  | 6     |



|                                |     |                                                                                                                                                   |                          |                                                                                                                                                                    |               |
|--------------------------------|-----|---------------------------------------------------------------------------------------------------------------------------------------------------|--------------------------|--------------------------------------------------------------------------------------------------------------------------------------------------------------------|---------------|
| <b>Recruitment</b>             | 14a | Dates defining the periods of recruitment and follow-up                                                                                           |                          |                                                                                                                                                                    | 6             |
|                                | 14b | Why the trial ended or was stopped                                                                                                                |                          |                                                                                                                                                                    | 6             |
| <b>Baseline data</b>           | 15  | A table showing baseline demographic and clinical characteristics for each group                                                                  |                          |                                                                                                                                                                    | 22-23         |
| <b>Numbers analysed</b>        | 16  | For each group, number of participants (denominator) included in each analysis and whether the analysis was by original assigned groups           |                          |                                                                                                                                                                    | 6-7           |
| <b>Outcomes and estimation</b> | 17a | For each primary and secondary outcome, results for each group, and the estimated effect size and its precision (such as 95% confidence interval) |                          |                                                                                                                                                                    | 7-11          |
|                                | 17b | For binary outcomes, presentation of both absolute and relative effect sizes is recommended                                                       |                          |                                                                                                                                                                    | 7-11          |
| <b>Ancillary analyses</b>      | 18  | Results of any other analyses performed, including subgroup analyses and adjusted analyses, distinguishing pre-specified from exploratory         |                          |                                                                                                                                                                    | 7-11          |
| <b>Harms</b>                   | 19  | All important harms or unintended effects in each group (for specific guidance see CONSORT for harms)                                             | CONSORT-AI 19 Extension  | Describe results of any analysis of performance errors and how errors were identified, where applicable. If no such analysis was planned or done, explain why not. | 11, 34, 37-40 |
| <b>Discussion</b>              |     |                                                                                                                                                   |                          |                                                                                                                                                                    |               |
| <b>Limitations</b>             | 20  | Trial limitations, addressing sources of potential bias, imprecision, and, if relevant, multiplicity of analyses                                  |                          |                                                                                                                                                                    | 16-18         |
| <b>Generalisability</b>        | 21  | Generalisability (external validity, applicability) of the trial findings                                                                         |                          |                                                                                                                                                                    | 17            |
| <b>Interpretation</b>          | 22  | Interpretation consistent with results, balancing benefits and harms, and considering other relevant evidence                                     |                          |                                                                                                                                                                    | 12-19         |
| <b>Other Information</b>       |     |                                                                                                                                                   |                          |                                                                                                                                                                    |               |
| <b>Registration</b>            | 23  | Registration number and name of trial registry                                                                                                    |                          |                                                                                                                                                                    | 34            |
| <b>Protocol</b>                | 24  | Where the full trial protocol can be accessed, if available                                                                                       |                          |                                                                                                                                                                    | 34            |
| <b>Funding</b>                 | 25  | Sources of funding and other support (such as supply of drugs), role of funders                                                                   | CONSORT-AI 25 Extension. | State whether and how the AI intervention and/or its code can be accessed, including any restrictions to access or re-use.                                         | 19-20, 34     |

<sup>a</sup> We strongly recommend reading this statement in conjunction with the CONSORT 2010 Explanation and Elaboration for important clarifications on all the items.

<sup>b</sup> Indicates page numbers to be completed by authors during protocol development.
